# Supplementary material for: Serum biomarker profile orchestrating the seroconversion status of patients with autoimmune diseases upon planned primary 17DD Yellow fever vaccination
Source: PubMed Central journal article supplement (PMC8128885; doi:10.1038/s41598-021-89770-8), 2021-05-17
Supplement: 41598_2021_89770_MOESM2_ESM.pdf [file 41598_2021_89770_MOESM2_ESM.pdf]

**Serum biomarker profile orchestrating the seroconversion status of patients with autoimmune diseases upon planned primary 17DD Yellow Fever vaccination**

Ismael Artur da Costa-Rocha<sup>a\*</sup>, Ketty Lysie Libardi Lira Machado<sup>b\*</sup>, Ana Carolina Campi-Azevedo<sup>a</sup>, Andréa Teixeira-Carvalho<sup>a</sup>, Vanessa Peruhype-Magalhães<sup>a</sup>, Sheila Maria Barbosa de Lima<sup>c</sup>, Emily Hime Miranda<sup>c</sup>, Gisela Freitas Trindade<sup>c</sup>, Thays Zanon Casagrande<sup>b</sup>, Samira Tatiyama Miyamoto<sup>b</sup>, Sávio Carvalho Deotti<sup>b</sup>, Rafaela Villa Real Barbosa<sup>b</sup>, Priscila Costa Martins Rocha<sup>b</sup>, Erica Vieira Serrano<sup>b</sup>, Valquiria Garcia Dinis<sup>b,d</sup>, Sônia Alves Gouvêa<sup>b</sup>, Maria Bernadete Renoldi de Oliveira Gavi<sup>b</sup>, Lidia Balarini da Silva<sup>b</sup>, Ruben Horst Duque<sup>b</sup>, Ana Paula Espíndula Gianordoli<sup>b</sup>, Maria de Fatima Bissoli<sup>b</sup>, Maria da Penha Gomes Gouvea<sup>b</sup>, Lauro Ferreira da Silva Pinto-Neto<sup>d</sup>, Ana Paula Neves Burian<sup>e</sup>, Francieli Fontana Sutile Tardetti Fantinato<sup>f</sup>, Gecilmara Salviato Pileggi<sup>g</sup>, Licia Maria Henrique da Mota<sup>h</sup>, Valéria Valim<sup>b#</sup> and Olindo Assis Martins-Filho<sup>a#</sup>

**Supplementary Table 1. Demographic and immunomodulatory therapy**

| <b>Features</b>                          | <b>HC<br/>(n = 21)</b> | <b>AID<br/>(n = 140)</b> | <b>RA<br/>(n = 38)</b> | <b>SpA<br/>(n = 51)</b> | <b>SLE<br/>(n = 21)</b> | <b>SS<br/>(n = 30)</b> |
|------------------------------------------|------------------------|--------------------------|------------------------|-------------------------|-------------------------|------------------------|
| <b>Women/Man,<br/>Ratio (%)</b>          | 14/07<br>(67)          | 106/34<br>(76)           | 30/08<br>(79)          | 27/24<br>(53)           | 21/00<br>(100)          | 28/02<br>(93)          |
| <b>Age, mean (SD), years</b>             | 54 (15)                | 49 (14)                  | 52 (15)                | 48 (11)                 | 44 (16)                 | 53 (13)                |
| <b>PRED, %</b>                           | -                      | 7.9                      | 10.5                   | 2.0                     | 28.6                    | 0.0                    |
| <b>MTX, %</b>                            | -                      | 35.0                     | 57.9                   | 33.3                    | 14.3                    | 23.3                   |
| <b>LFN, %</b>                            | -                      | 10.0                     | 21.1                   | 7.8                     | 4.8                     | 3.3                    |
| <b>HCO, %</b>                            | -                      | 26.4                     | 18.4                   | 0.0                     | 76.2                    | 46.7                   |
| <b>SSA, %</b>                            | -                      | 7.9                      | 0.0                    | 19.6                    | 0.0                     | 3.3                    |
| <b>NSAI, %</b>                           | -                      | 10.7                     | 10.5                   | 17.6                    | 9.5                     | 0.0                    |
| <b>AZA, %</b>                            | -                      | 2.9                      | 0.0                    | 0.0                     | 19.0                    | 0.0                    |
| <b>Biological Therapy<sup>a</sup>, %</b> | -                      | 22.9                     | 26.3                   | 43.1                    | 0.0                     | 0.0                    |

Abbreviations: HC, Healthy Controls; AID, Autoimmune Disease Patients; RA, Rheumatic Arthritis; SpA, Spondyloarthritis; SLE, Systemic Lupus Erythematosus; SS, primary Sjögren's Syndrome; PRED, Prednisone; MTX, Methotrexate; LFN, Leflunomide; HCO, Hydroxychloroquine; SSA, Sulfasalazine; NSAI, non-steroidal antiinflammatory; AZA, Azathioprine. <sup>a</sup> Biological Therapy included: adalimumab, etanercept, infliximab, abatacept and rituximab.
